# Supplementary material
Source: MDPI journal article supplement (https://www.mdpi.com/2225-1154/11/8/158)
Supplement: s1 [file s1]

Supplementary Table S1. Collinearity Diagnostics

| Variable                             | VIF  | SQRT | SQRTVIF | Tolerance | R-2Squared |
|--------------------------------------|------|------|---------|-----------|------------|
| Climate anxiety                      | 1.29 |      | 1.14    | 0.7751    | 0.2249     |
| Sex: - Female                        | 1.33 |      | 1.15    | 0.7524    | 0.2476     |
| - Diverse                            | 1.01 |      | 1.01    | 0.9859    | 0.0141     |
| Age                                  | 2.01 |      | 1.42    | 0.4963    | 0.5037     |
| Children in own household: Yes       | 1.2  |      | 1.1     | 0.83      | 0.17       |
| Marital status: Living together      | 1.15 |      | 1.07    | 0.8687    | 0.1313     |
| Education: - Appl. Upper Sec. School | 1.16 |      | 1.08    | 0.8587    | 0.1413     |
| - Polytechnic Secondary School       | 1.19 |      | 1.09    | 0.8392    | 0.1608     |
| - Intermediate Secondary School      | 1.34 |      | 1.16    | 0.7454    | 0.2546     |
| - Lower Secondary Sch./Without sch.  | 1.29 |      | 1.13    | 0.7768    | 0.2232     |
| - Currently in school training/educ. | 1.04 |      | 1.02    | 0.966     | 0.034      |
| Employment status: - Retired         | 1.82 |      | 1.35    | 0.5499    | 0.4501     |
| - Other                              | 1.38 |      | 1.17    | 0.7244    | 0.2756     |
| Smoking: daily                       | 1.28 |      | 1.13    | 0.7797    | 0.2203     |
| Yes, sometimes                       | 1.69 |      | 1.3     | 0.5929    | 0.4071     |
| No, not anymore                      | 1.83 |      | 1.35    | 0.547     | 0.453      |
| Sport: - Less 1 hour per week        | 1.44 |      | 1.2     | 0.6959    | 0.3041     |
| - 1-2 hours a week                   | 1.59 |      | 1.26    | 0.6289    | 0.3711     |
| - 2-4 hours a week                   | 1.49 |      | 1.22    | 0.6727    | 0.3273     |
| - more than 4 hours a week           | 1.42 |      | 1.19    | 0.704     | 0.296      |
| Alcohol: - Daily                     | 3.19 |      | 1.79    | 0.3136    | 0.6864     |
| - Several times a week               | 3.03 |      | 1.74    | 0.3297    | 0.6703     |
| - Once a week                        | 3.34 |      | 1.83    | 0.2994    | 0.7006     |
| - 1-3 times a month                  | 3.95 |      | 1.99    | 0.2532    | 0.7468     |
| - Less often                         | 3.47 |      | 1.86    | 0.2886    | 0.7114     |
| Chronic diseases: Presence           | 1.35 |      | 1.16    | 0.7401    | 0.2599     |
| Self-rated health                    | 1.43 |      | 1.2     | 0.6983    | 0.3017     |
| Coronavirus anxiety                  | 1.31 |      | 1.15    | 0.7609    | 0.2391     |

Mean VIF1.75

Supplementary Table S2. Diagnostics for logistic regression (with probable depression as outcome)

| <b>Log-Lik Intercept Only:</b> | <b>-1670.604</b> | <b>Log-Lik Full Model:</b> | <b>-1170.200</b> |
|--------------------------------|------------------|----------------------------|------------------|
| D(3056):                       | 2340.401         | LR(28):                    | 1000.808         |
|                                |                  | Prob > LR:                 | 0.000            |
| McFadden's R2:                 | 0.3              | McFadden's Adj R2:         | 0.279            |
| Maximum Likelihood R2:         | 0.277            | Cragg & Uhler's R2:        | 0.419            |
| McKelvey and Zavoina's R2:     | 0.466            | Efron's R2:                | 0.331            |
| Variance of y*:                | 6.162            | Variance of error:         | 3.29             |
| Count R2:                      | 0.832            | Adj Count R2:              | 0.275            |
| AIC:                           | 0.78             | AIC*n:                     | 2410.401         |
| BIC:                           | -22218.379       | BIC':                      | -775.793         |

Supplementary Table S3. Diagnostics for logistic regression (with probable anxiety as outcome)

| <b>Log-Lik Intercept Only:</b> | <b>-1361.405</b> | <b>Log-Lik Full Model:</b> | <b>-1011.496</b> |
|--------------------------------|------------------|----------------------------|------------------|
| D(3056):                       | 2022.991         | LR(28):                    | 699.819          |
|                                |                  | Prob > LR                  | 0.000            |
| McFadden's R2:                 | 0.257            | McFadden's Adj R2:         | 0.231            |
| Maximum Likelihood R2:         | 0.203            | Cragg & Uhler's R2:        | 0.346            |
| McKelvey and Zavoina's R2:     | 0.391            | Efron's R2:                | 0.252            |
| Variance of y*:                | 5.405            | Variance of error:         | 3.29             |
| Count R2:                      | 0.857            | Adj Count R2:              | 0.109            |
| AIC:                           | 0.677            | AIC*n:                     | 2092.991         |
| BIC:                           | -22535.789       | BIC':                      | -474.804         |
